# Supplementary material
Source: PubMed Central journal article supplement (PMC6246814)
Supplement: NIHMS1507956-supplement-1.pdf [file NIHMS1507956-supplement-1.pdf]

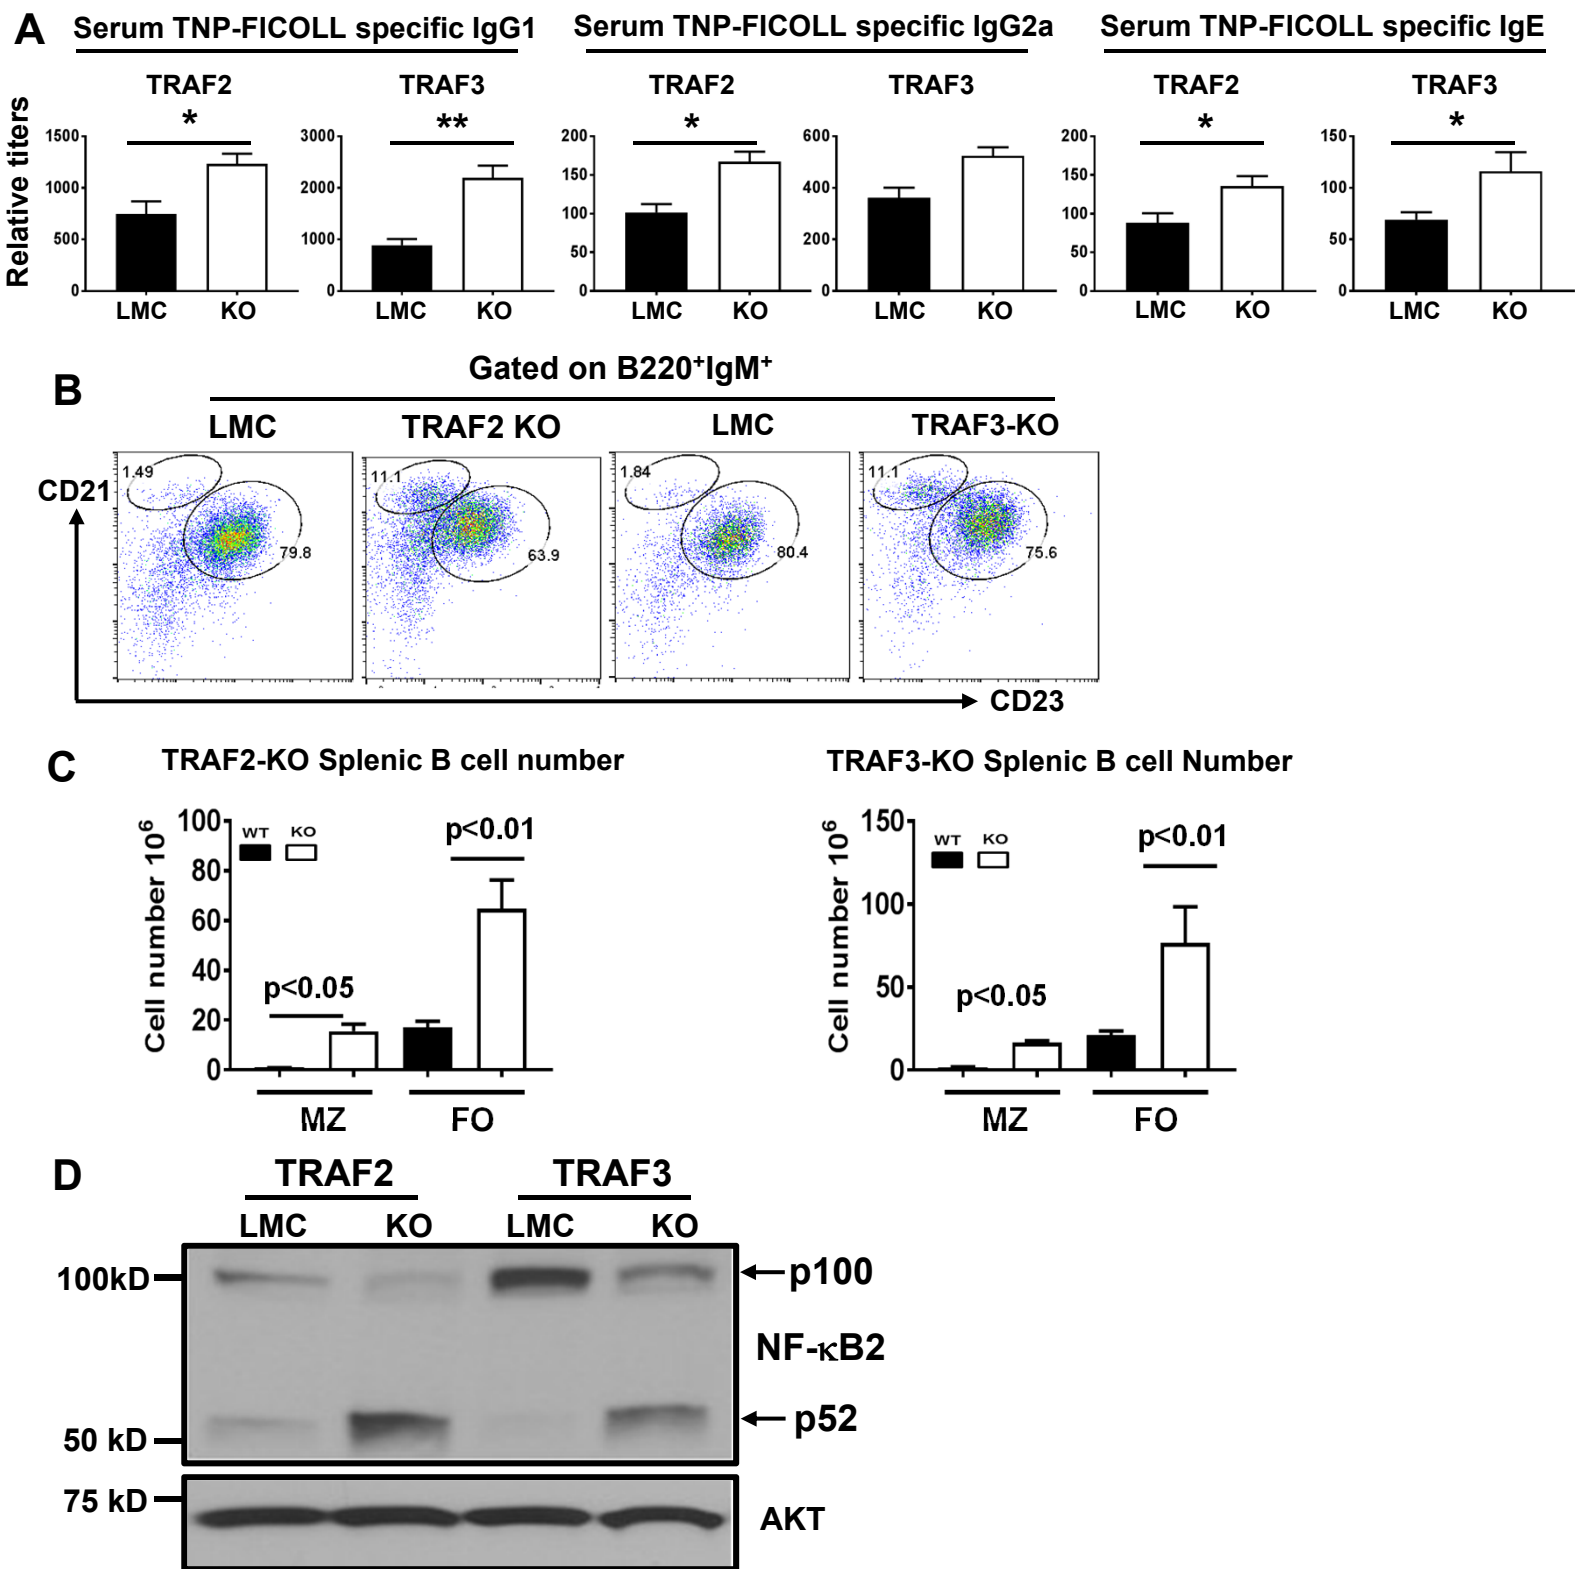

**Supplemental Figure 1: (A) Effect of B-TRAF2 or TRAF3 KO on marginal zone and follicular B cell development as well as Ab response against TI Ag. (A)** Ab response against TI Ag. B-TRAF2 or TRAF3 KO and corresponding LMC mice were immunized with TNP-FICOLL. 14 days after immunization, sera were collected and TNP-specific IgG1, IgG2a and IgE were measured by ELISA as described in Material and Method. Data were representative of 3 independent experiments. P values were calculated by t-test, \* $p \leq 0.05$ , \*\* $p \leq 0.01$ . LMC: littermate control. KO: knockout. TNP-FICOLL: 2,4,6-trinitrophenol-conjugated FICOLL. **(B) Splenic marginal zone (MZ) and follicular (FO) B cell analysis.** Splenocytes from CD19Cre(+)/TRAF2<sup>fl/fl</sup> or LMC (TRAF2<sup>fl/fl</sup>), CD19Cre(+)/TRAF3<sup>fl/fl</sup> or LMC (TRAF3<sup>fl/fl</sup>) mice, respectively, were analyzed by flow cytometry. Representative FACS plots of MZ and FO B cells (gated on B220<sup>+</sup>IgM<sup>+</sup>) in B-TRAF2-KO or B-TRAF3-KO mice and corresponding LMC are shown from 3 independent experiments. **(C) The splenic MZ and FO B cell numbers.** Splenic B cells were counted in LMC (n=10) and B-TRAF2-KO (n=10) or LMC (n=16) and B-TRAF3-KO (n=16) mice. Statistical analysis: Student's t-Test. **(D) Evaluation of active NF-κB2 in resting TRAF2 or TRAF3 KO B cells.** Naïve B cells were isolated from spleens of B-TRAF2 or B-TRAF3 KO mice and corresponding LMC mice. Western blot was performed to evaluate NF-κB2 precursor (p100) and active (p52) forms. AKT served as protein loading control. Representative data of three independent experiments are shown.

## Supplemental Table I: Abs used in the study

### FLOW CYTOMETRY

| Antibody                                | Clone   | Catalogue  | Company        |
|-----------------------------------------|---------|------------|----------------|
| APC-conj. anti-IgG1                     | A85-1   | 560089     | BD Biosciences |
| BUV395-conj. anti-IgM                   | R6-60.2 | 564025     | BD Biosciences |
| BV605-conj. anti-CD19                   | 6D5     | 115539     | Biologend      |
| BV785-conj. anti-mouse/human B220/CD45R | RA3-6B2 | 103245     | Biologend      |
| PE-conj. Anti-mouse IgE                 | RME-1   | 12-5992-81 | Biologend      |
| A647-conj. anti-CD23                    | B3B4    | 101612     | Biologend      |
| PE-conj. Rat-anti-mouse CD21/CD35       | 7G6     | 552957     | BD Biosciences |

### WESTERN / ELISA

| Antibody                         | Clone       | Catalogue   | Company                |
|----------------------------------|-------------|-------------|------------------------|
| Rabbit anti-panAKT               | C67E7       | 4691S       | Cell Signaling         |
| anti-AID                         | 30F12       | 4949S       | Cell Signaling         |
| rabbit-anti-TRAF2                | poly        | 4712S       | Cell Signaling         |
| anti-RelA (p65)                  | D14E12      | 8242S       | Cell Signaling         |
| anti-phospho-p65                 | S536 (93H1) | 3033S       | Cell Signaling         |
| anti-I $\kappa$ B $\alpha$       | L35A5       | 4814P       | Cell Signaling         |
| anti-NF- $\kappa$ B2 (p100/p52)  | poly        | 4882S       | Cell Signaling         |
| anti- $\beta$ -actin             | C4          | sc-47778    | SantaCruz              |
| anti-GAPDH                       | FL-335      | sc-25778    | SantaCruz              |
| anti-TRAF3                       | H122        | sc-1828     | SantaCruz              |
| anti-I $\kappa$ B $\alpha$       | C-21        | sc-371      | SantaCruz              |
| HRP-conj. Goat-anti-mouse IgG1   | poly        | 115-035-205 | Jackson Immunoresearch |
| HRP-conj. Goat-anti-mouse IgG    | poly        | 115-035-166 | Jackson Immunoresearch |
| HRP-conj. Donkey-anti-rabbit IgG | poly        | 711-035-152 | Jackson Immunoresearch |
| HRP-conj. Goat-anti-mouse IgE    | poly        | 1110-05     | Southern Biotech       |
| HRP-conj. Goat-anti-mouse IgG2a  | poly        | ab97245     | abcam                  |
